# Supplementary material for: Characterization of avian influenza virus attachment patterns to human and pig tissues
Source: PubMed Central journal article supplement (PMC6093914; doi:10.1038/s41598-018-29578-1), 2018-08-15
Supplement: 41598_2018_29578_MOESM1_ESM.pdf [file 41598_2018_29578_MOESM1_ESM.pdf]

## **Supplementary material**

### **Characterization of avian influenza virus attachment patterns to human and pig tissues**

Per Eriksson<sup>1†</sup>, Cecilia Lindskog<sup>2†</sup>, Ebbe Engholm<sup>3</sup>, Ola Blixt<sup>3</sup>, Jonas Waldenström<sup>4</sup>, Vincent Munster<sup>5</sup>, Åke Lundkvist<sup>1</sup>, Björn Olsen<sup>6</sup>, Elsa Jourdain<sup>7</sup> & Patrik Ellström<sup>6\*</sup>

#### **Affiliations**

1. Zoonosis Science Centre, Department of Medical Biochemistry and Microbiology (IMBIM), Uppsala University, Uppsala SE-751 23, Sweden
2. Department of Immunology, Genetics and Pathology, Science for Life Laboratory, Uppsala University, Uppsala SE-751 85, Sweden
3. Department of Chemistry, Chemical Biology, University of Copenhagen, Frederiksberg C DK-1871, Denmark
4. Centre for Ecology and Evolution in Microbial Model Systems, Linnaeus University, Kalmar SE-392 31, Sweden
5. Laboratory of Virology, Rocky Mountain Laboratories, National Institute of Allergy and Infectious Diseases, National Institutes of Health, Hamilton, Montana 59840, U.S.A.
6. Zoonosis Science Centre, Department of Medical Sciences, Uppsala University, Uppsala SE-751 23, Sweden
7. UMR0346 - EPIA, INRA, VetAgro Sup, Saint Genès Champanelle FR-63122, France.

†These authors contributed equally to the study.

**Table S1.** Glycan structures in the glycan array with normalized attachment (%) of each virus. The attachment signals were normalized towards the glycan with the highest virus attachment for each tested virus. Only normalized values with a value >3 times larger than baseline are shown. HH3N2 – human H3N2, MH3N2 – mallard H3N2, MH6N1 – mallard H6N1, TH12N5 – ruddy turnstone H12N5, and GH16N3 – black-headed gull H16N3 influenza viruses.

|           | Glycan number | Glycan structure                            | Abbreviation <sup>1</sup> | HH3N2 | MH3N2 | MH6N1 | TH12N5 | GH16N3 |
|-----------|---------------|---------------------------------------------|---------------------------|-------|-------|-------|--------|--------|
| No SA     | 1             | GalNAc <sub>asp</sub>                       | Tn                        |       |       |       |        |        |
|           | 2             | Galβ1-3GalNAc <sub>asp</sub>                | TF                        |       |       |       |        |        |
|           | 3             | Galβ1-4Glcβ <sub>sp</sub>                   | Lac                       |       |       |       |        |        |
|           | 4             | Galβ1-4GlcNAcβ <sub>sp</sub>                | LN                        |       |       |       |        |        |
|           | 5             | Galβ1-4GlcNAc-Bi-antennary N-glycan         | LN bi-antennary N-glycan  |       |       |       |        |        |
| 3 Su      | 6             | [3Su]Galβ1-4GlcNAcβ <sub>sp</sub>           | 3Su-LN                    |       |       |       |        |        |
|           | 7             | [3Su]Galβ1-3GalNAcβ <sub>sp</sub>           | 3Su-TF                    |       |       |       |        |        |
|           | 8             | [3Su]Galβ1-3GlcNAcβ <sub>sp</sub>           | 3Su-Le <sup>c</sup>       |       |       |       |        |        |
| 6 Su      | 9             | [6Su]Galβ1-4GlcNAcβ <sub>sp</sub>           | 6Su-LN                    |       |       |       |        |        |
|           | 10            | [6Su]Galβ1-3GlcNAcβ <sub>sp</sub>           | 6Su-Le <sup>c</sup>       |       |       |       |        |        |
|           | 11            | [6Su]Galβ1-4[6Su]GlcNAcβ <sub>sp</sub>      | di-6Su-LN                 |       |       |       |        |        |
|           | 12            | [6Su]Galβ1-3[6Su]GlcNAcβ <sub>sp</sub>      | di-6Su-Le <sup>c</sup>    |       |       |       |        |        |
|           | 13            | [6Su]Galβ1-3GalNAc <sub>asp</sub>           | 6Su-TF                    |       |       |       |        |        |
| Di/tri Su | 14            | [3Su]Galβ1-4[6Su]GlcNAcβ <sub>sp</sub>      | 3,6Su-LN                  |       |       |       |        |        |
|           | 15            | [3,6diSu]Galβ1-4GlcNAcβ <sub>sp</sub>       | 3,6diSu-LN                |       |       |       |        |        |
|           | 16            | [4,6diSu]Galβ1-4GlcNAcβ <sub>sp</sub>       | 4,6diSu-LN                |       |       |       |        |        |
|           | 17            | [4,6diSu]Galβ1-4GlcNAcβ <sub>sp</sub> 3     | 4,6diSu-LN                |       |       |       |        |        |
|           | 18            | [3,6diSu]Galβ1-4[6Su]GlcNAcβ <sub>sp</sub>  | 3,6triSu-LN               |       |       |       |        |        |
| SA        | 19            | Neu5Ac <sub>asp</sub>                       | Neu5Ac                    |       |       |       |        |        |
|           | 20            | Neu5Gc <sub>asp</sub>                       | Neu5Gc                    |       |       |       |        |        |
|           | 21            | [9OAc]-Neu5Ac <sub>asp</sub>                | 9OAc-Neu5Ac               |       |       |       |        |        |
| α2,3 SA   | 22            | Neu5Acα2-3Galβ <sub>sp</sub>                | “avian receptor”          |       | 90    | 31    | 76     |        |
|           | 23            | Neu5Acα2-3Galβ1,4Glcβ <sub>sp</sub>         | 3'SL                      |       | 99    | 77    | 75     |        |
|           | 24            | Neu5Acα2-3Galβ1,4GlcNAcβ <sub>sp</sub>      | 3'SLN                     |       | 61    | 86    | 73     |        |
|           | 25            | Neu5Acα2-3Galβ1,3GalNAc <sub>asp</sub>      | 3'STF                     |       | 77    | 65    | 83     |        |
|           | 26            | Neu5Acα2-3[6Su]Galβ1,4GlcNAcβ <sub>sp</sub> | 6Su-3'SLN                 |       | 75    | 6     | 48     |        |

|                 |    |                                                                                 |                                  |     |     |     |    |     |
|-----------------|----|---------------------------------------------------------------------------------|----------------------------------|-----|-----|-----|----|-----|
|                 | 27 | KDN $\alpha$ 2-3Gal $\beta$ 1-4GlcNAc $\beta$ sp                                | Kdn-LN                           |     |     |     |    |     |
|                 | 28 | Neu5Aca2-3Gal $\beta$ 1-4[6Su]GlcNAc $\beta$ sp                                 | 6Su-3'SLN                        |     | 97  | 28  | 90 | 100 |
|                 | 29 | GalNAc $\beta$ 1-4[Neu5Aca2-3]Gal $\beta$ 1-4Glc $\beta$ sp                     |                                  |     |     |     |    |     |
|                 | 30 | Neu5Aca2-8Neu5Aca2-3Gal $\beta$ 1-4Glc $\beta$ sp                               | 3'diSL                           |     |     |     |    |     |
|                 | 31 | GalNAc $\beta$ 1-4[Neu5Aca2-8Neu5Aca2-3]Gal $\beta$ 1-4Glc $\beta$ sp           |                                  |     |     |     |    |     |
|                 | 32 | Neu5Aca2-8Neu5Aca2-8Neu5Aca2-3Gal $\beta$ 1-4Glc $\beta$ sp                     | 3'triSL                          |     |     |     |    |     |
|                 | 33 | GalNAc $\beta$ 1-4[Neu5Aca2-8Neu5Aca2-8Neu5Aca2-3]Gal $\beta$ 1-4Glc $\beta$ sp |                                  |     |     |     |    |     |
|                 | 34 | Neu5Aca2-3Gal $\beta$ 1-4GlcNAc-Bi-antennary N-glycan                           | 3'SLN bi-antennary N-glycan      |     | 100 | 80  | 82 |     |
|                 | 35 | Neu5Aca2-3Gal $\beta$ 1-4GlcNAc-Tri(I)-antennary N-glycan                       | 3'SLN tri(I)-antennary N-glycan  |     | 100 | 100 | 98 |     |
|                 | 36 | Neu5Aca2-3Gal $\beta$ 1-4GlcNAc-Tri(II)-antennary N-glycan                      | 3'SLN tri(II)-antennary N-glycan |     | 100 | 89  | 97 |     |
|                 | 37 | Neu5Aca2-3Gal $\beta$ 1-4GlcNAc-Tetra-antennary N-glycan                        | 3'SLN tetra-antennary N-glycan   |     | 92  | 15  | 75 |     |
| $\alpha$ 2,6 SA | 38 | Neu5Aca2-6GalNAc $\alpha$ sp                                                    | "human receptor"                 |     |     |     |    |     |
|                 | 39 | Neu5Aca2-6Gal $\beta$ sp                                                        | "human receptor"                 |     |     |     |    |     |
|                 | 40 | Neu5Aca2-6Gal $\beta$ 1-4Glc $\beta$ sp                                         | 6'SL                             |     |     |     |    |     |
|                 | 41 | Neu5Aca2-6Gal $\beta$ 1-4GlcNAc $\beta$ sp                                      | 6'SLN                            | 31  |     |     |    |     |
|                 | 42 | Neu5Aca2-6Gal $\beta$ 1-4GlcNAc $\beta$ 1-3Gal $\beta$ 1-4GlcNAc $\beta$ sp     | 6'SdiLN                          | 100 | 5   |     |    |     |
|                 | 43 | Neu5Aca2-6Gal $\beta$ 1-3GalNAc $\alpha$ sp                                     | 6'STF                            |     |     |     |    |     |
|                 | 44 | Neu5Gca2-6Gal $\beta$ 1-4GlcNAc $\beta$ sp                                      | 6'Neu5Gc-LN                      |     |     |     |    |     |
|                 | 45 | [9OAc]Neu5Aca2-6Gal $\beta$ 1-4GlcNAc $\beta$ sp                                | 9OAc-6'SLN                       |     |     |     |    |     |
|                 | 46 | [6Su]Gal $\beta$ 1-3[Neu5Aca2-6]GalNAc $\alpha$ sp                              |                                  |     | 86  | 47  | 85 |     |
|                 | 47 | Neu5Aca2-6Gal $\beta$ 1-4[6Su]GlcNAc $\beta$ sp                                 | 6Su-6'SLN                        | 38  |     |     |    |     |
|                 | 48 | Gal $\beta$ 1-3[NeuAca2-6]GlcNAc $\beta$ 1-3Gal $\beta$ 1-4Glc $\beta$ sp       |                                  |     |     |     |    |     |
|                 | 49 | Neu5Aca2-6Gal $\beta$ 1-4GlcNAc-Bi-antennary N-glycan                           | 6'SLN bi-antennary N-glycan      |     |     |     |    |     |
|                 | 50 | Neu5Aca2-6Gal $\beta$ 1-4GlcNAc-Tri(I)-antennary N-glycan                       | 6'SLN tri(I)-antennary N-glycan  |     | 5   |     |    |     |

|          |    |                                                                     |                                  |  |  |    |     |  |
|----------|----|---------------------------------------------------------------------|----------------------------------|--|--|----|-----|--|
|          | 51 | Neu5Ac $\alpha$ 2-6Gal $\beta$ 1-4GlcNAc-Tri(II)-antennary N-glycan | 6'SLN tri(II)-antennary N-glycan |  |  | 3  |     |  |
|          | 52 | Neu5Ac $\alpha$ 2-6Gal $\beta$ 1-4GlcNAc-Tetra-antennary N-glycan   | 6'SLN tetra-antennary N-glycan   |  |  |    |     |  |
| oligo SA | 53 | Neu5Ac $\alpha$ 2-3Gal $\beta$ 1-3[Neu5Ac $\alpha$ 2-6]GalNAcasp    | 3'S[Neu5Ac $\alpha$ 2-6]TF       |  |  | 84 | 100 |  |
|          | 54 | Neu5Ac $\alpha$ 2-8Neu5Acasp                                        | diNeu5Ac                         |  |  |    |     |  |
|          | 55 | Neu5Ac $\alpha$ 2-8Neu5Ac $\alpha$ 2-8Neu5Acasp                     | triNeu5Ac                        |  |  |    |     |  |

1. Abbreviations where applicable.

**Table S2.** Number of virus stained human individuals in full section vs. TMA format.

N/A – not applicable.

| <b>Tissue</b>      | <b>Human H3N2</b>   |            | <b>Mallard H3N2</b> |            | <b>Turnstone H12N5</b> |            |
|--------------------|---------------------|------------|---------------------|------------|------------------------|------------|
|                    | <b>Full section</b> | <b>TMA</b> | <b>Full section</b> | <b>TMA</b> | <b>Full section</b>    | <b>TMA</b> |
| <b>Eye</b>         | N/A                 | N/A        | 3                   | 1          | 3                      | N/A        |
| <b>Nasopharynx</b> | 4                   | N/A        | 4                   | 5          | 4                      | 5          |
| <b>Bronchus</b>    | 4                   | N/A        | 4                   | 1          | 4                      | 1          |
| <b>Alveoli</b>     | 4                   | N/A        | 4                   | 6          | 4                      | 6          |
| <b>Colon</b>       | N/A                 | N/A        | N/A                 | 7          | N/A                    | 7          |

**Table S3.** Number of lectin stained human individuals in full section vs. TMA

format. N/A – not applicable.

| <b>Tissue</b>      | <b>MAA-II</b>       |            | <b>SNA</b>          |            |
|--------------------|---------------------|------------|---------------------|------------|
|                    | <b>Full section</b> | <b>TMA</b> | <b>Full section</b> | <b>TMA</b> |
| <b>Eye</b>         | 1 <sup>1</sup>      | N/A        | 1 <sup>1</sup>      | N/A        |
| <b>Nasopharynx</b> | 2                   | 7          | 2                   | 6          |
| <b>Bronchus</b>    | 1                   | 1          | 1                   | 1          |
| <b>Alveoli</b>     | 1                   | 6          | 1                   | 6          |
| <b>Colon</b>       | N/A                 | 6          | N/A                 | 6          |

1. Repeated staining with the same individual performed.

**Table S4.** Number of viral stained pig individuals in full section vs. TMA format. N/A – not applicable.

| Tissue     | Human H3N2   |     | Mallard H3N2 |     | Mallard H6N1 |     | Turnstone H12N5 |     | Gull H16N3   |     |
|------------|--------------|-----|--------------|-----|--------------|-----|-----------------|-----|--------------|-----|
|            | Full section | TMA | Full section | TMA | Full section | TMA | Full section    | TMA | Full section | TMA |
| Trachea    | N/A          | 5   | N/A          | 5   | N/A          | 5   | N/A             | 5   | N/A          | 5   |
| Bronchiole | 2            | N/A | 4            | N/A | 4            | N/A | 2               | N/A | 4            | N/A |
| Alveoli    | 2            | N/A | 4            | N/A | 4            | N/A | 2               | N/A | 4            | N/A |

**Table S5.** Number of lectin stained pig individuals in full section vs. TMA format. N/A – not applicable.

| Tissue     | MAA-II         |     | SNA          |     |
|------------|----------------|-----|--------------|-----|
|            | Full section   | TMA | Full section | TMA |
| Trachea    | 1              | N/A | 1            | N/A |
| Bronchiole | 2 <sup>1</sup> | N/A | 2            | N/A |
| Alveoli    | 2 <sup>1</sup> | N/A | 2            | N/A |

1. Repeated staining with the same individuals performed.
